# Supplementary material
Source: PubMed Central journal article supplement (PMC4212787)
Supplement: nn502807n_si_004.pdf [file nn502807n_si_004.pdf]

Intravital Confocal microscopic images of tumors with 3D reconstruction at 1 h following intratumoral injection of Bromelain modified MSN and MSN: MSN (Movie 1.avi) Bromelain modified MSN, (Movie 2.avi) MSN.
